# Supplementary material for: A survey of stapling methods to increase affinity, activity, and stability of ghrelin analogues
Source: Royal Society of Chemistry journal article supplement (doi:10.1039/d3md00441d), 2023-11-30
Supplement: d3md00441d1.pdf [file d3md00441d1.pdf]

## SUPPORTING INFORMATION

### A Survey of Stapling Methods to Increase Affinity, Activity, and Stability of Ghrelin Analogues

Juan J Esteban<sup>a</sup>, Julia R. Mason<sup>a</sup>, Jakob Kaminski<sup>a</sup>, Rithwik Ramachandran<sup>b</sup>, Leonard G Luyt<sup>a,c,d</sup>

<sup>a</sup>Department of Chemistry, University of Western Ontario, 1151 Richmond Street, London, Ontario, N6A 3K7, Canada.

<sup>b</sup>Department of Physiology and Pharmacology, University of Western Ontario, 1151 Richmond Street, London, Ontario N6A 5C1, Canada.

<sup>c</sup>Departments of Medical Imaging and Oncology, University of Western Ontario, 1151 Richmond Street, London, Ontario, N6A 3K7, Canada.

<sup>d</sup>London Regional Cancer Program, Lawson Health Research Institute, 800 Commissioners Road East, London, Ontario, N6A 4L6, Canada.

|                                                                                                                                   |     |
|-----------------------------------------------------------------------------------------------------------------------------------|-----|
| Analytical HPLC Results for Compounds <b>1-5</b> .....                                                                            | S2  |
| Mass Spectra for Compounds <b>1-5</b> , [ <b>Dpr<sup>3</sup></b> ]Ghrelin.....                                                    | S4  |
| IC <sub>50</sub> Displacement Curves for Compounds <b>1-5</b> , [ <b>Dpr<sup>3</sup></b> ]Ghrelin, and <b>Human Ghrelin</b> ..... | S8  |
| Circular Dichroism Spectra for Compounds <b>1-5</b> , <b>Human Ghrelin</b> .....                                                  | S11 |
| Statistical Analysis of $\beta$ -arrestin Recruitment BRET Assays.....                                                            | S15 |

## Analytical HPLC Results for Compounds 1-5

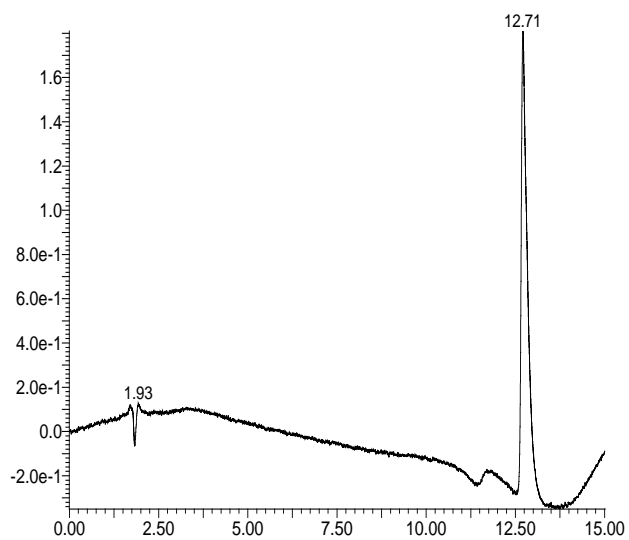

**Figure S1.** Analytical UV chromatogram from HPLC of purified compound **1** (20-80% acetonitrile/water)

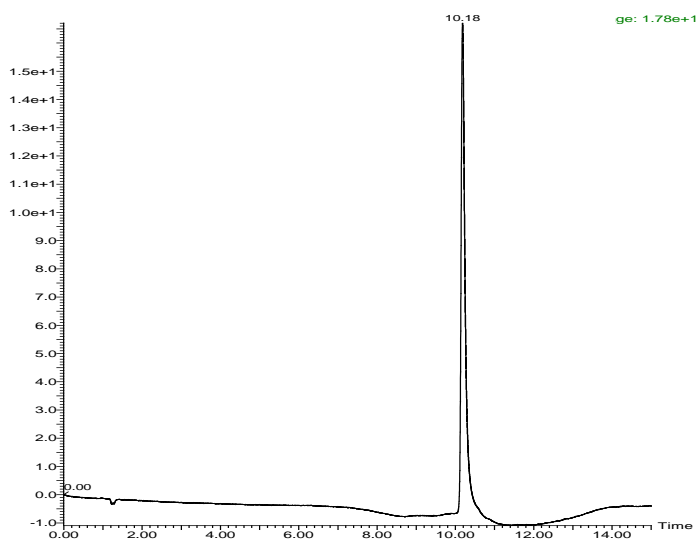

**Figure S2.** Analytical UV chromatogram from HPLC of purified compound **2** (20-80% acetonitrile/water)

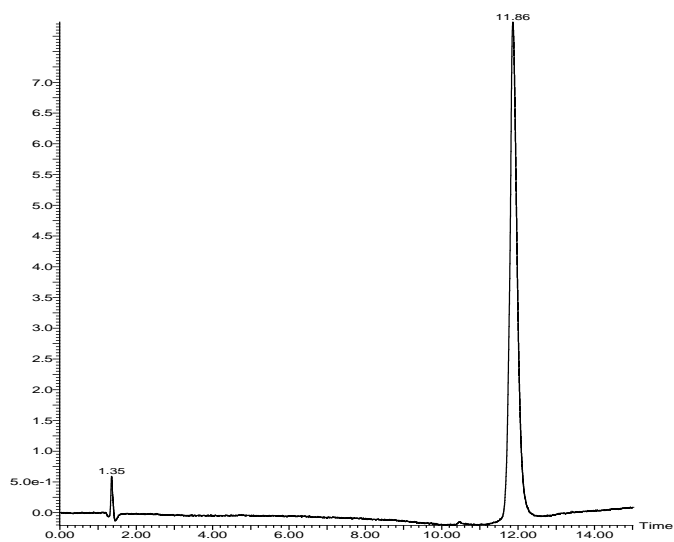

**Figure S3.** Analytical UV chromatogram from HPLC of purified compound **3** (20-50% acetonitrile/water)

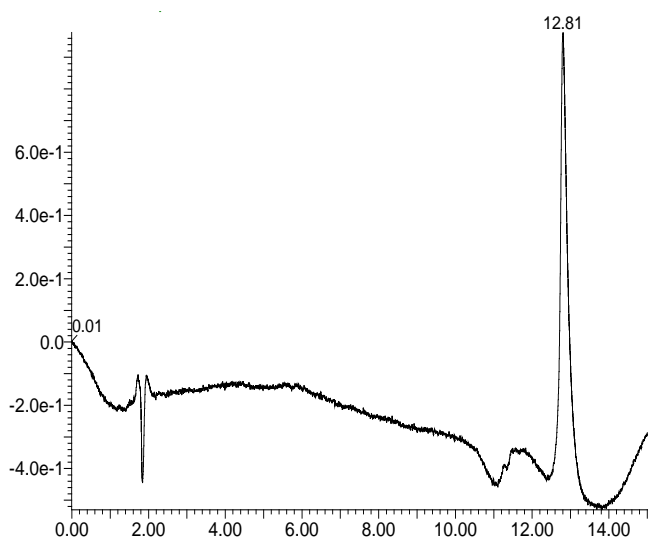

**Figure S4.** Analytical UV chromatogram from HPLC of purified compound **4** (20-80% acetonitrile/water)

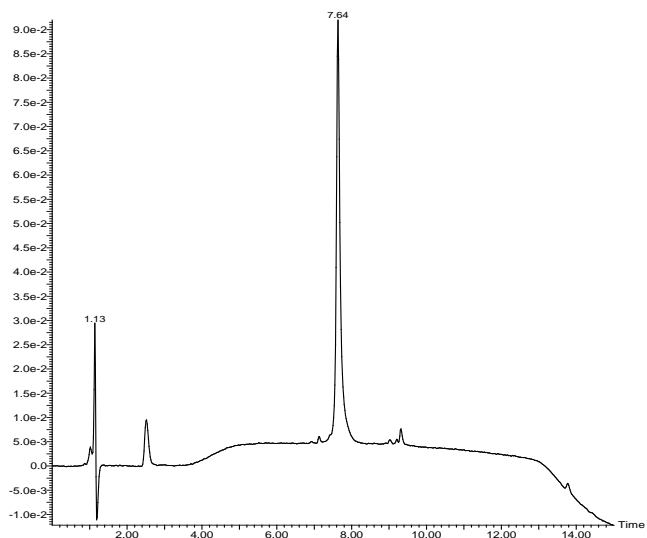

**Figure S5.** Analytical UV chromatogram from HPLC of purified compound **5** (10-70% acetonitrile/water).

## Mass Spectra for Compounds **1-5**, [Dpr<sup>3</sup>]Ghrelin

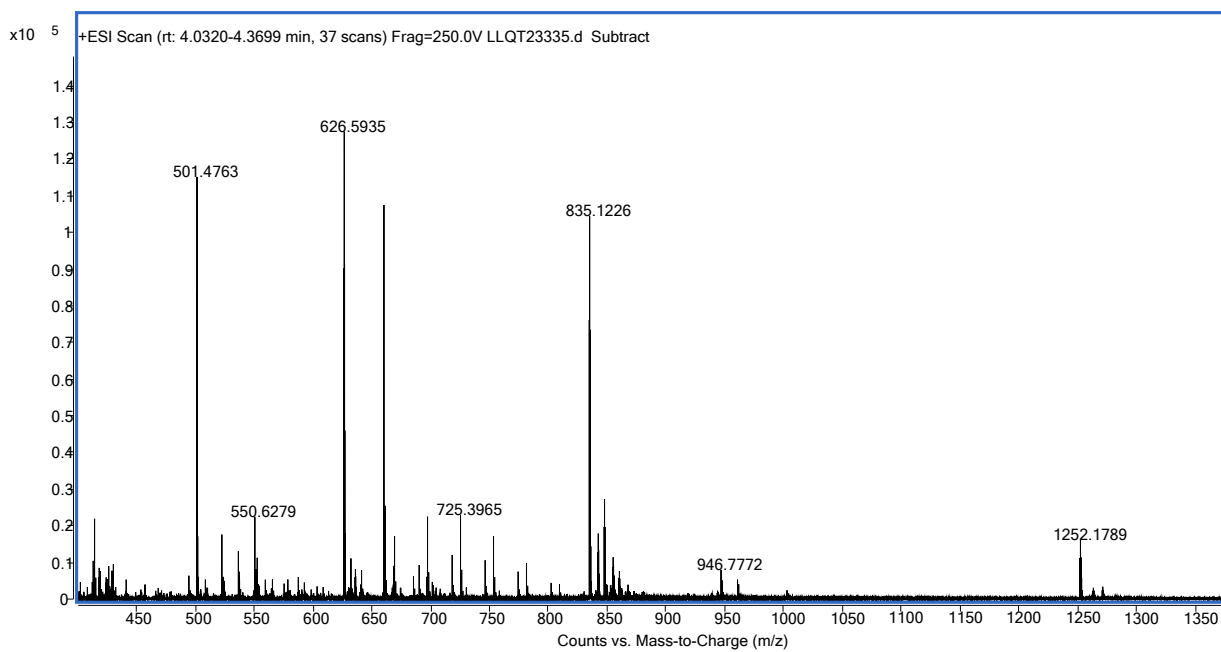

**Figure S6.** ESI+ Mass Spectrum of compound **1**.

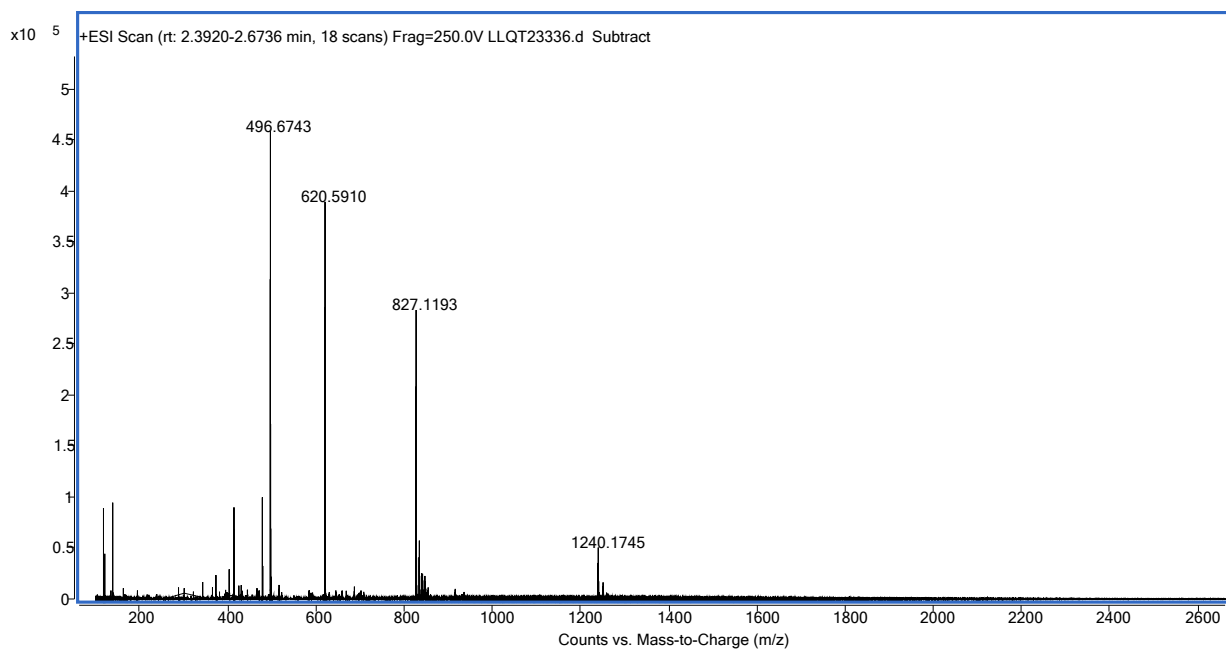

**Figure S7.** ESI+ Mass Spectrum of compound **2**.

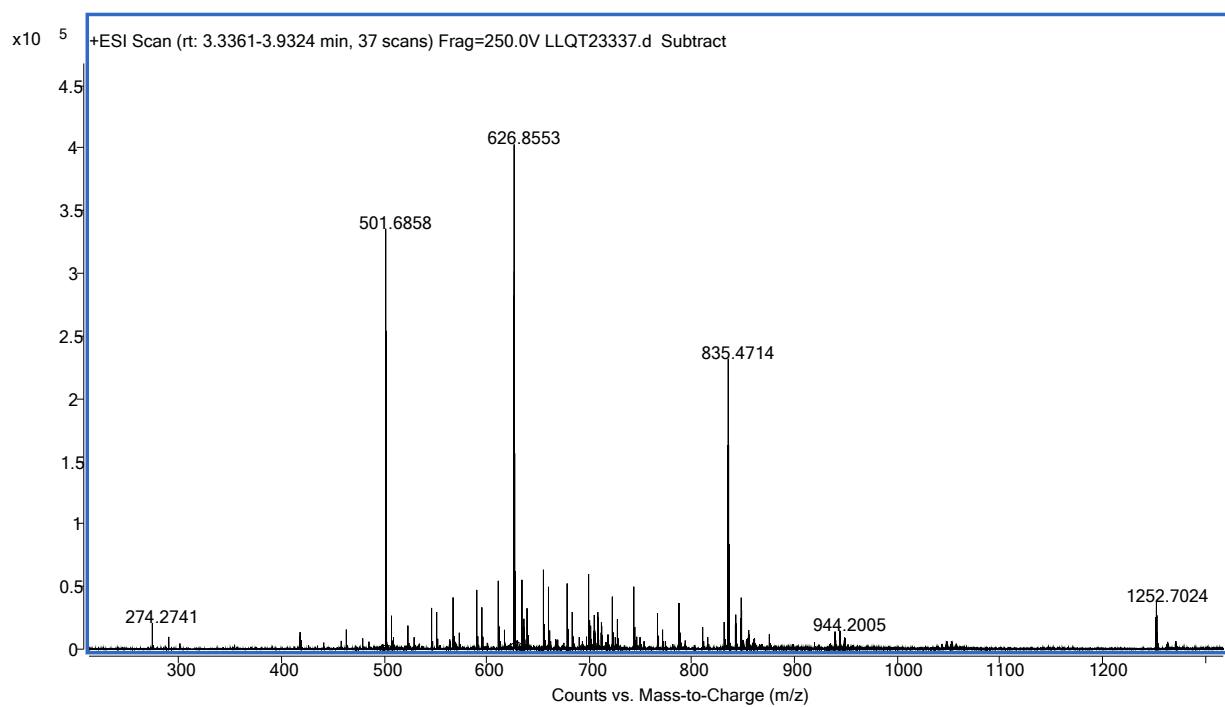

**Figure S8.** ESI+ Mass Spectrum of compound **3**.

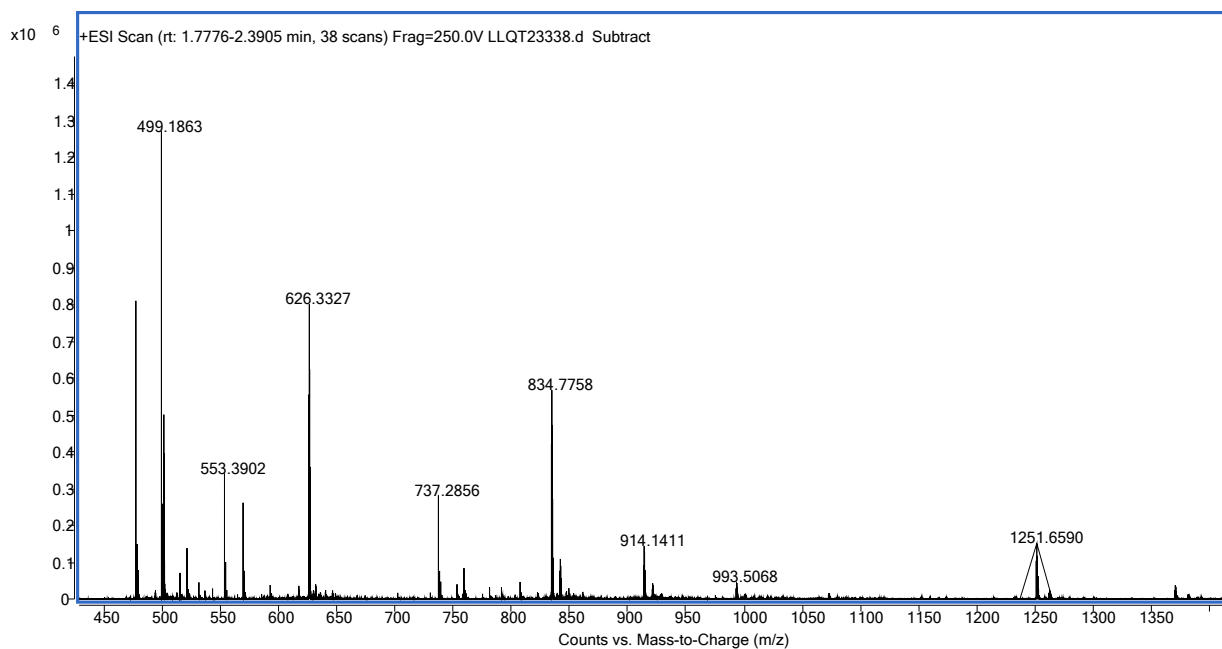

**Figure S9.** ESI+ Mass Spectrum of compound **4**.

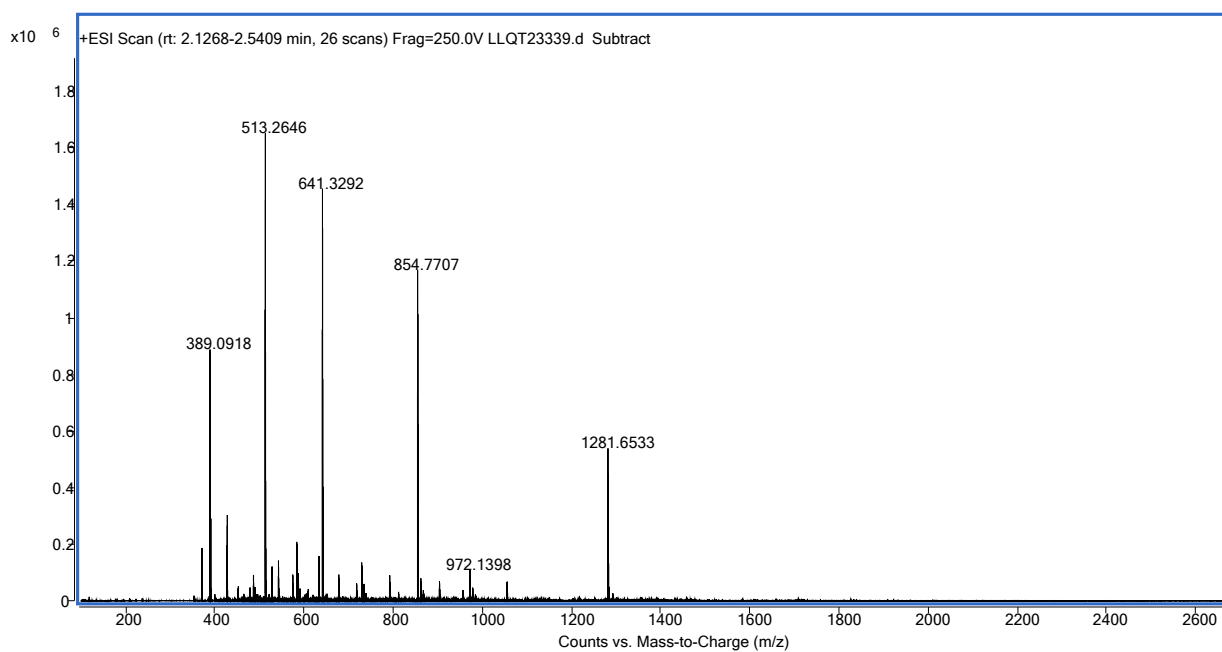

**Figure S10.** ESI+ Mass Spectrum of compound **5**.

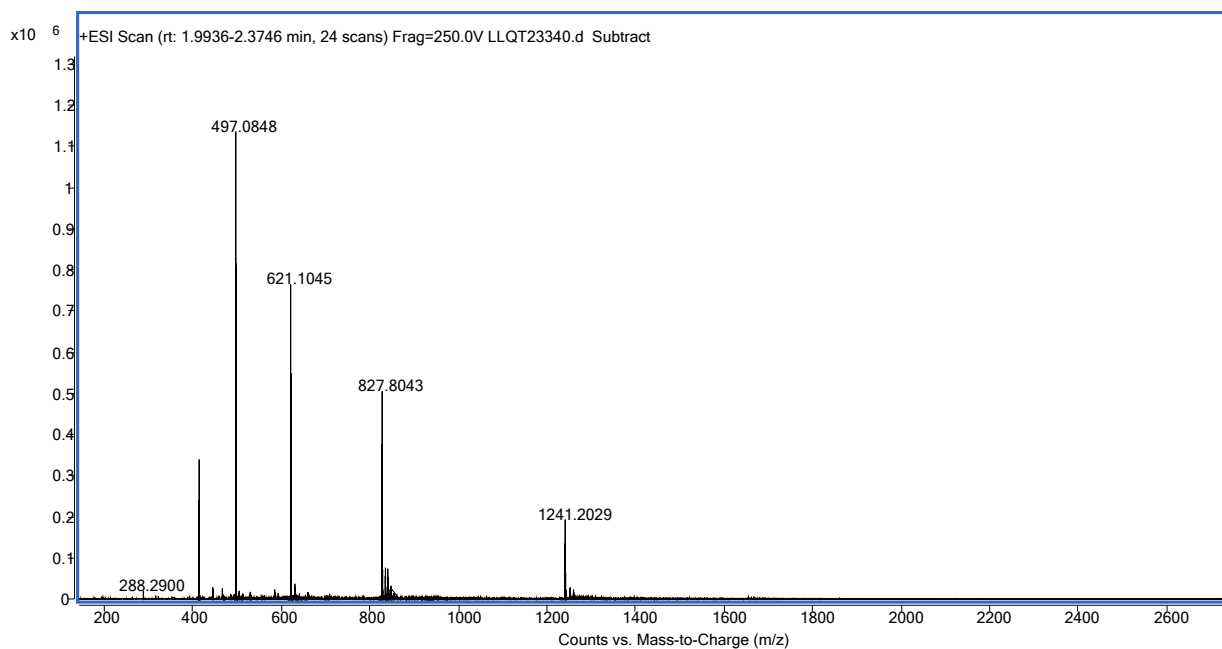

**Figure S11.** ESI+ Mass Spectrum of **[Dpr<sup>3</sup>]Ghrelin(1-20)**.

**Table S1.** HRMS for compounds **1-5** and **[Dpr<sup>3</sup>]Ghrelin(1-20)**.

| Compound                              | Sequence                                      | [M+3H] <sup>3+</sup><br>Calculated | [M+3H] <sup>3+</sup><br>Observed |
|---------------------------------------|-----------------------------------------------|------------------------------------|----------------------------------|
| <b>[Dpr<sup>3</sup>]Ghrelin(1-20)</b> | H-GS-Dpr(octanoyl)-<br>FLSPEHQRVQQRKESKK-OH   | 827.4663                           | 827.4700                         |
| <b>1 - Triazole Staple</b>            | H-GS-Dpr(octanoyl)-<br>FLSPEHQR[XQQRY]ESKK-OH | 834.7866                           | 834.7880                         |
| <b>2 - Lactam Staple</b>              | H-GS-Dpr(octanoyl)-<br>FLSPEHQR[KQQRD]ESKK-OH | 826.7829                           | 826.7851                         |
| <b>3 - Hydrocarbon Staple</b>         | H-GS-Dpr(octanoyl)-<br>FLSPEHQR[OQQRO]ESKK-OH | 835.1351                           | 835.1368                         |
| <b>4 - Glaser Staple</b>              | H-GS-Dpr(octanoyl)-<br>FLSPEHQR[ZQQRZ]ESKK-OH | 834.4390                           | 834.4411                         |
| <b>5 - Xylene-Thioether Staple</b>    | H-GS-Dpr(octanoyl)-<br>FLSPEHQR[CQQRC]ESKK-OH | 854.4342                           | 854.4370                         |

## IC<sub>50</sub> Displacement Curves for Compounds 1-5, [Dpr<sup>3</sup>]Ghrelin, and Human Ghrelin

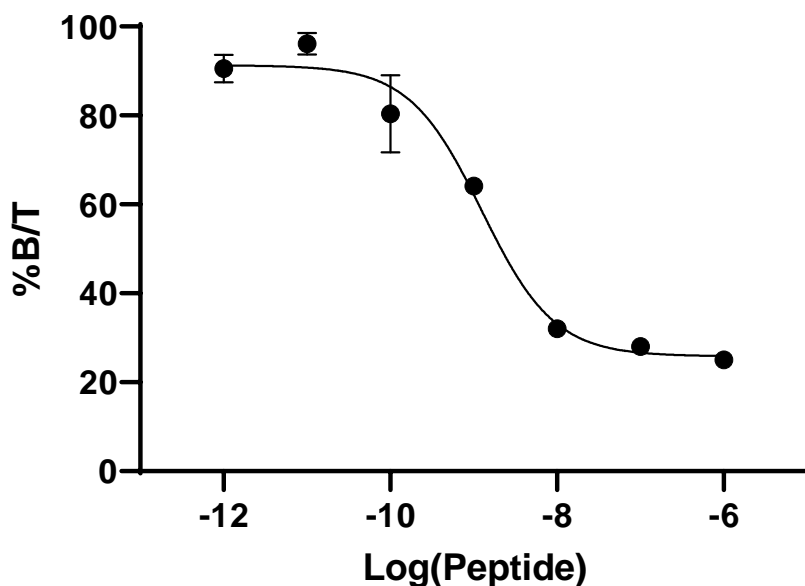

**Figure S12.** IC<sub>50</sub> curve for compound 1. Log concentration of compound (M) plotted against %B/T, denoting the percentage of bound [<sup>125</sup>I]-ghrelin to the GHSR-1a transfected HEK293 cells.

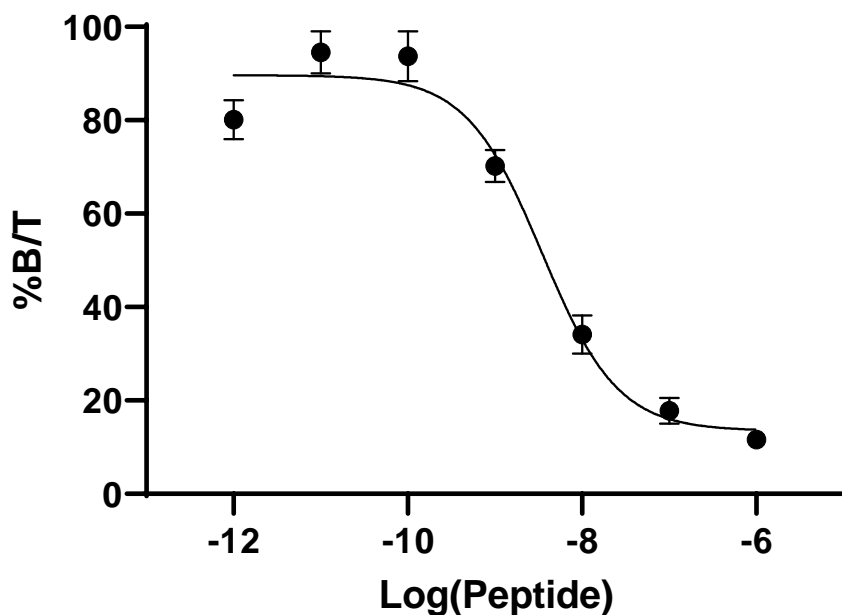

**Figure S13.** IC<sub>50</sub> curve for compound 2. Log concentration of compound (M) plotted against %B/T, denoting the percentage of bound [<sup>125</sup>I]-ghrelin to the GHSR-1a transfected HEK293 cells.



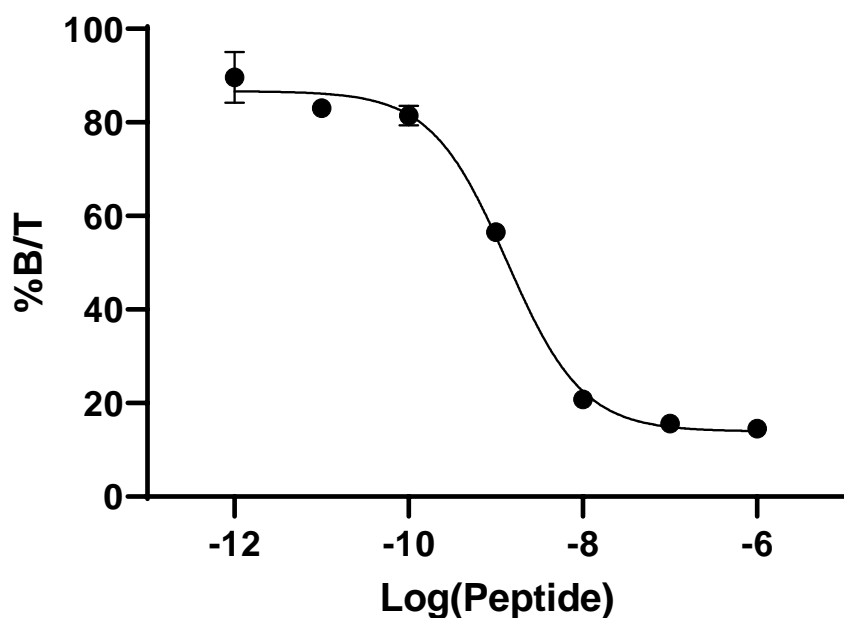

**Figure S14.**  $IC_{50}$  curve for compound 3. Log concentration of compound (M) plotted against %B/T, denoting the percentage of bound  $[^{125}\text{I}]$ -ghrelin to the GHSR-1a transfected HEK293 cells.

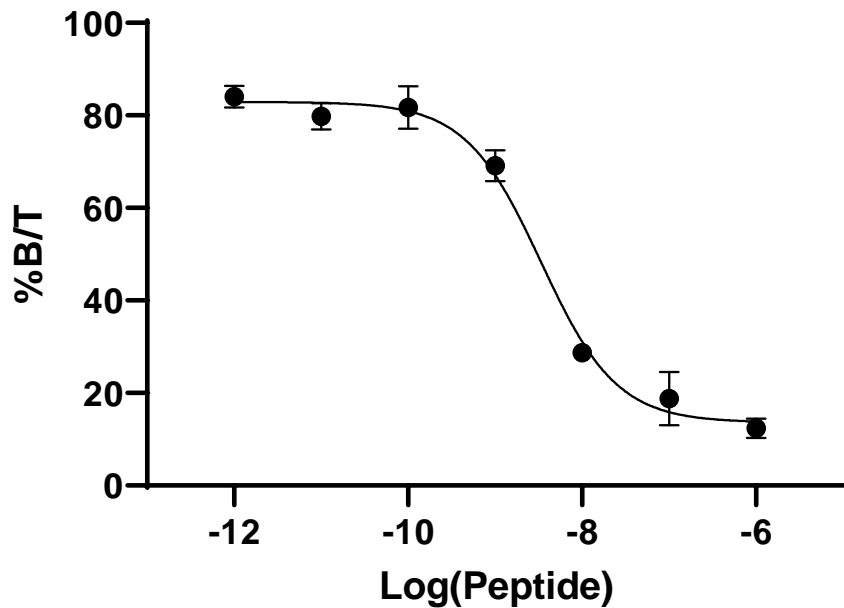

**Figure S15.**  $IC_{50}$  curve for compound 4. Log concentration of compound (M) plotted against %B/T, denoting the percentage of bound  $[^{125}\text{I}]$ -ghrelin to the GHSR-1a transfected HEK293 cells.

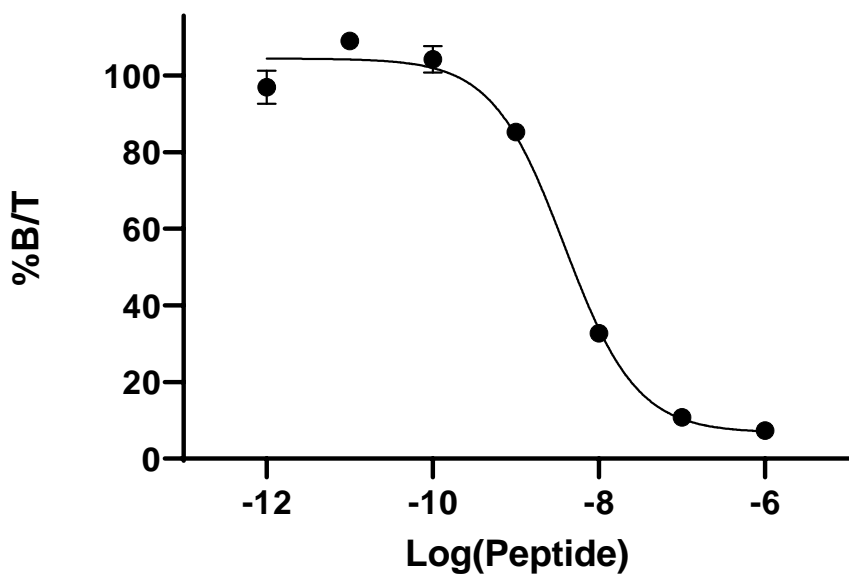

**Figure S16.** IC<sub>50</sub> curve for compound 5. Log concentration of compound (M) plotted against %B/T, denoting the percentage of bound [<sup>125</sup>I]-ghrelin to the GHSR-1a transfected HEK293 cells.

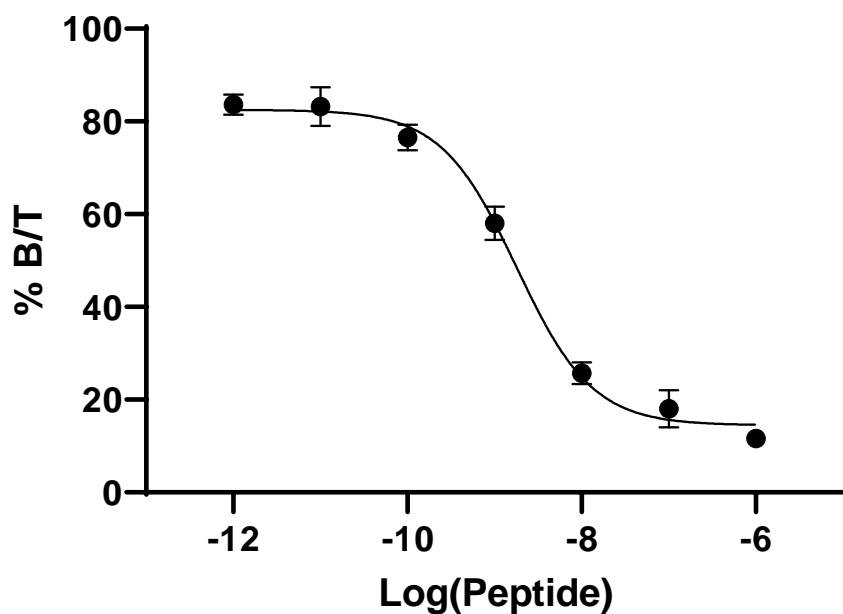

**Figure S17.** IC<sub>50</sub> curve for [Dpr<sup>3</sup>]Ghrelin(1-20). Log concentration of compound (M) plotted against %B/T, denoting the percentage of bound [<sup>125</sup>I]-ghrelin to the GHSR-1a transfected HEK293 cells.

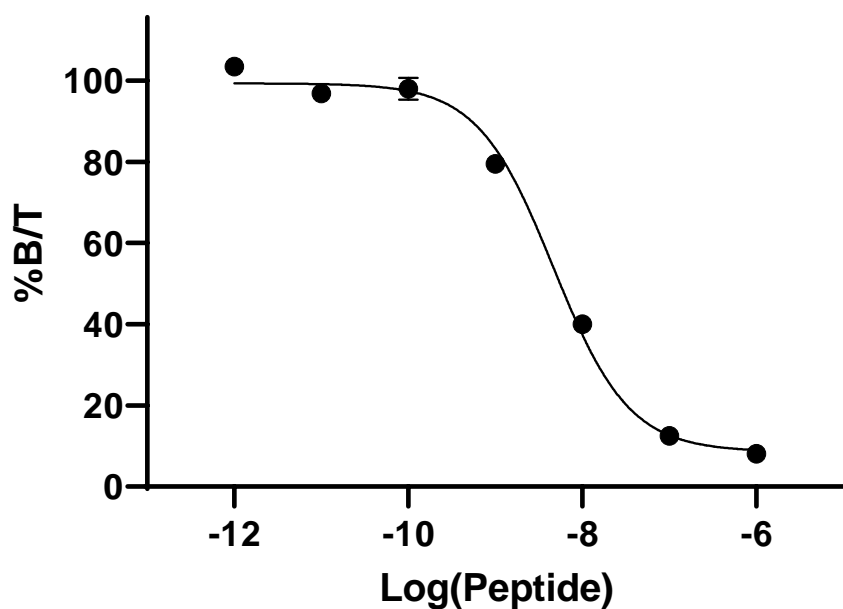

**Figure S18.** IC<sub>50</sub> curve for Human ghrelin. Log concentration of compound (M) plotted against %B/T, denoting the percentage of bound [<sup>125</sup>I]-ghrelin to the GHSR-1a transfected HEK293 cells.

### Circular Dichroism Spectra for Compounds **1-5**, **Human Ghrelin**

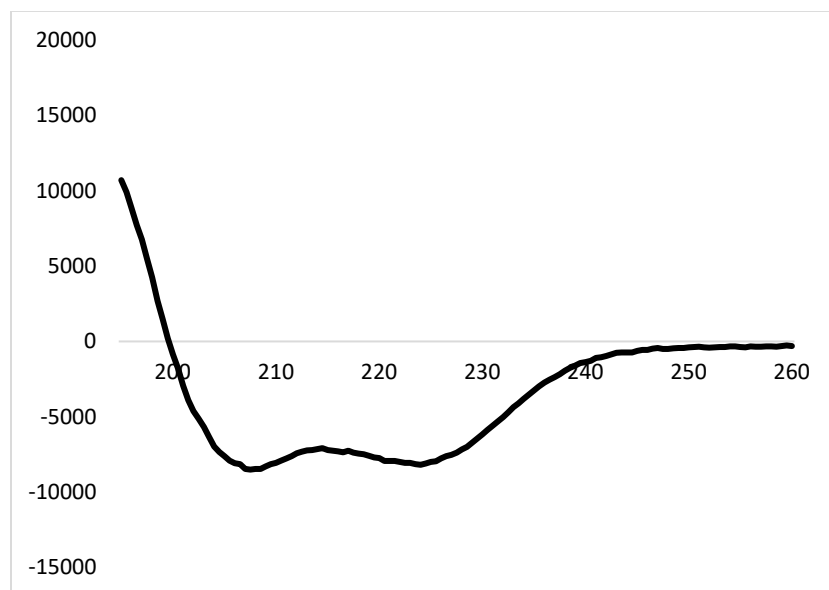

**Figure S19.** CD spectra for compound **1**

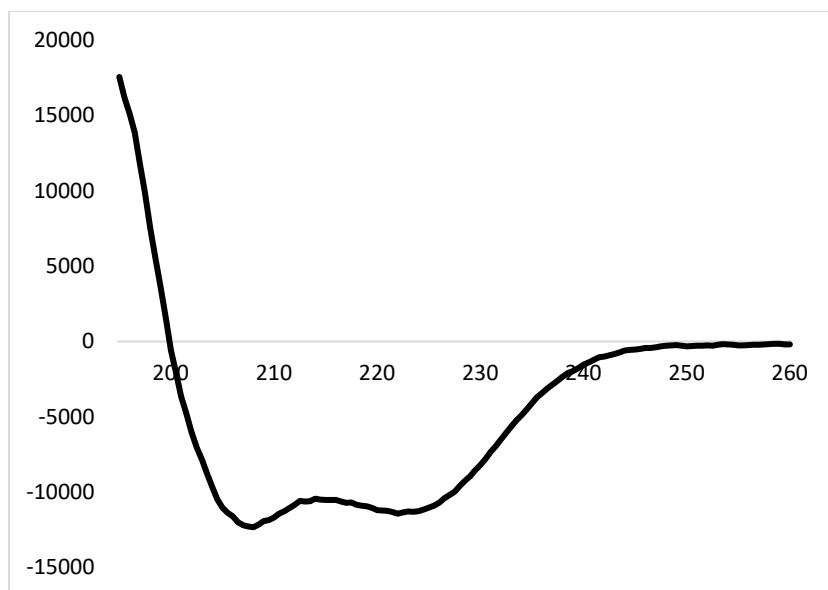

**Figure S20.** CD spectra for compound 2

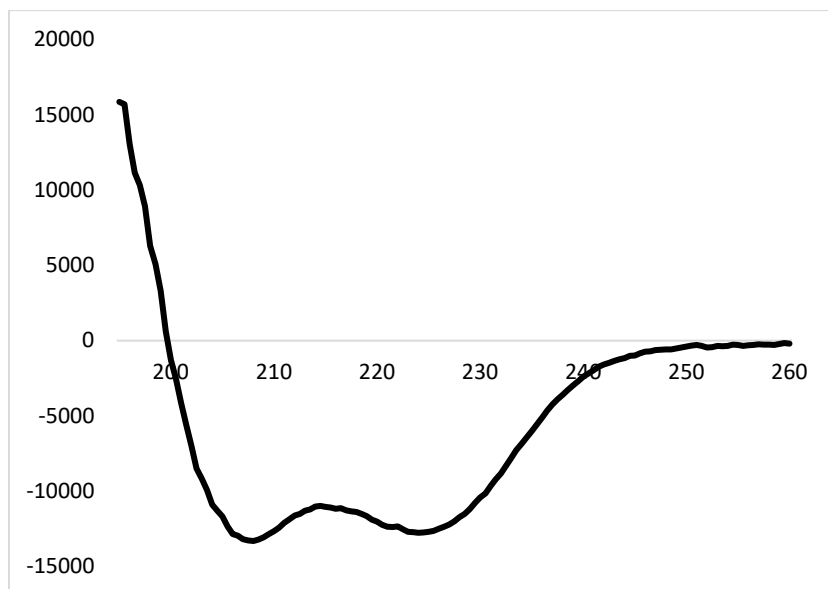

**Figure S21.** CD spectra for compound 3

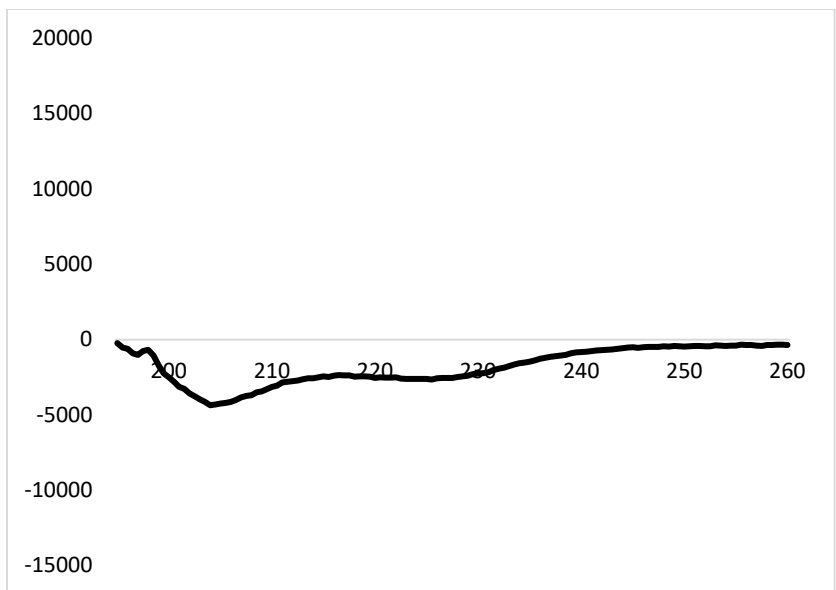

**Figure S22.** CD spectra for compound **4**

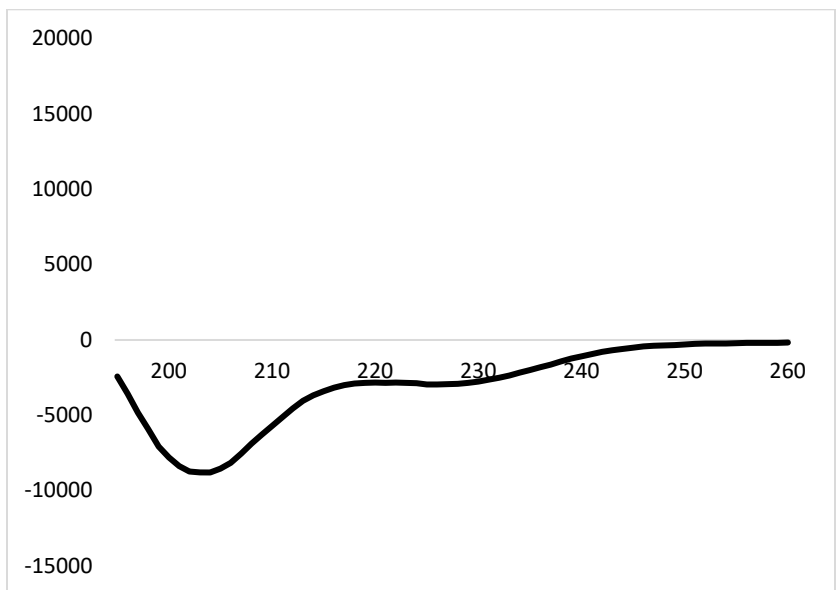

**Figure S23.** CD spectra for compound **5**

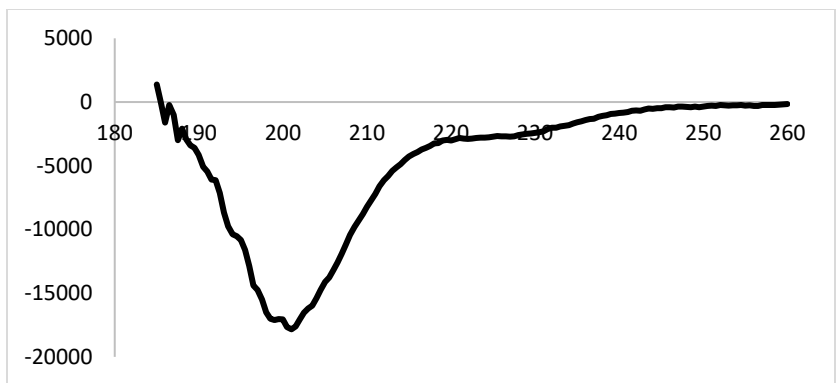

**Figure S24.** CD spectra for Human Ghrelin

## Statistical Analysis of $\beta$ -arrestin Recruitment BRET Assays

**Table S2.** Statistical analysis *t*-test and *p* values of  $\beta$ -arrestin 1 Recruitment BRET Assays.

| $\beta$ -arrestin 1                   |                        |            |          |                |                        |
|---------------------------------------|------------------------|------------|----------|----------------|------------------------|
|                                       | <b>E<sub>max</sub></b> | <b>SEM</b> | <b>N</b> | <b>P value</b> | <b>P value summary</b> |
| <b>[Dpr<sup>3</sup>]Ghrelin(1-20)</b> | 0.331                  | 0.027      | 24       |                |                        |
| <b>1 - Triazole Staple</b>            | 0.259                  | 0.016      | 18       | 0.0394         | *                      |
| <b>2 - Lactam Staple</b>              | 0.220                  | 0.016      | 18       | 0.002          | **                     |
| <b>3 - Hydrocarbon Staple</b>         | 0.383                  | 0.030      | 9        | 0.2828         | ns                     |
| <b>4 - Glaser Staple</b>              | 0.435                  | 0.028      | 9        | 0.0347         | *                      |
| <b>5 - Xylene-Thioether Staple</b>    | 0.455                  | 0.029      | 12       | 0.0068         | **                     |

**Table S3.** Statistical analysis *t*-test and *p* values of  $\beta$ -arrestin 2 Recruitment BRET Assays.

| $\beta$ -arrestin 2                   |                        |            |          |                |                        |
|---------------------------------------|------------------------|------------|----------|----------------|------------------------|
|                                       | <b>E<sub>max</sub></b> | <b>SEM</b> | <b>N</b> | <b>P value</b> | <b>P value summary</b> |
| <b>[Dpr<sup>3</sup>]Ghrelin(1-20)</b> | 0.550                  | 0.028      | 23       |                |                        |
| <b>1 - Triazole Staple</b>            | 0.394                  | 0.022      | 18       | 0.0002         | ***                    |
| <b>2 - Lactam Staple</b>              | 0.388                  | 0.020      | 18       | <0.0001        | ****                   |
| <b>3 - Hydrocarbon Staple</b>         | 0.547                  | 0.044      | 9        | 0.9529         | ns                     |
| <b>4 - Glaser Staple</b>              | 0.544                  | 0.042      | 8        | 0.9043         | ns                     |
| <b>5 - Xylene-Thioether Staple</b>    | 0.609                  | 0.028      | 12       | 0.192          | ns                     |
